# Supplementary material
Source: PubMed Central journal article supplement (PMC4198492)
Supplement: NIHMS625134-supplement-251_2014_799_MOESM1_ESM.pdf [file NIHMS625134-supplement-251_2014_799_MOESM1_ESM.pdf]

Article title: Hematopoiesis In The Equine Fetal Liver Suggests Immune Preparedness

Journal: Immunogenetics

Authors: JM Battista, RL Tallmadge, T Stokol and MJB Felipe

Corresponding Author: MJB Felipe, Equine Immunology Lab, Department of Clinical Sciences, College of Veterinary Medicine, Cornell University, mbf6@cornell.edu

Supplemental Table 1. RT-PCR primer sequences for the hematopoietic genes studied.

| Gene    | GenBank ID      | Forward (5'-3')       | Reverse (5'-3')         | Product (bp) |
|---------|-----------------|-----------------------|-------------------------|--------------|
| CD34    | XM_001491596    | CTAGGGTGTGCTCCTTGCTC  | GACCAGTGCAATCAGGGTCT    | 209          |
| CEBPA   | NA <sup>a</sup> | TGGACAAGAACAGCAACGAG  | GCGGCTCAGTTGTTCCAC      | 167          |
| CXCL12  | XM_001489644    | CAGCCTGAGCTACAGATGTCC | CCTTTTCTGAGCAGCCTTTC    | 280          |
| GATA1   | XM_005614118    | TGTTTCCAGCAGTGCCTATG  | CCTGTTCTGCCATTTCATCT    | 247          |
| IL7     | CX592622        | AAAGACGGCAAAGAATATCGA | ACAGAGGTTCTTATTATCATCAC | 142          |
| IL7R    | CD469725        | ACATGCCTGCTCTGGTCTCT  | TCACGTGCATCCAATCATTT    | 580          |
| IGHM    | NW_001876796    | CTTCACTACGGAAGAGGTGC  | ACTCAGGCTGTCATAGGTGC    | 295          |
| IRF8    | XM_001502568    | ACGTGGTGGTCAAGGTCTTC  | AGCTCTTCCCAGTCTTCTCC    | 207          |
| KIT     | XM_001492243    | AGACCTGGAAGACCTGCTCA  | CATTCGGAAACCTTCCTTGA    | 376          |
| NOTCH1  | XM_001498582    | TCCTTCTGACCTGGATGAC   | CCATGTTGTCCTGGATGTTG    | 393          |
| PAX5    | XM_001504306    | CATCAAGCCTGGGGTAATTG  | CACGGTGTTCATTGTCACACA   | 157          |
| PU.1    | JN979560        | GAGACCATCCAGCTCCAGAC  | CAGCTCGGTGAAGTGGTTCT    | 315          |
| β-Actin | NM_001081838.1  | TCCCTGGAGAAGAGCTACGA  | GTGGACAATGAGGCCACAAT    | 350          |

<sup>a</sup>The forward primer was designed based on the consensus sequence for the alignment of human (NM\_004364), cow (NM\_176784), mouse (NM\_007678), and pig (XM\_003127015) sequences, while the reverse primer was designed from the horse sequence NW\_001867363.

Supplemental Table 2. Immunoglobulin heavy chain germline segment use, nucleotide identity with reference genome sequence, and junctional nucleotides

| Sequence             | IGHV    |                       | VD                    | IGHD            |                       | DJ                    | IGHJ           |                       |      |
|----------------------|---------|-----------------------|-----------------------|-----------------|-----------------------|-----------------------|----------------|-----------------------|------|
|                      | Gene    | Identity <sup>a</sup> | Junction <sup>b</sup> | Gene            | Identity <sup>a</sup> | Junction <sup>b</sup> | Gene           | Identity <sup>a</sup> |      |
| Fetal Liver (n = 30) |         |                       |                       |                 |                       |                       |                |                       |      |
| Fetus 1              | IGVDJ1  | IGHV2S2               | 100.0                 | 13              | IGHD7S1               | 100                   | 2              | IGHJ1S3               | 100  |
|                      | IGVDJ2  | IGHV2S3               | 99.1                  | 7               | IGHD15S2              | 100                   | 3 <sup>c</sup> | IGHJ1S2               | 100  |
|                      | IGVDJ3  | IGHV2S3               | 98.8                  | 14              | IGHD18S1              | 84.2                  | 0              | IGHJ1S2               | 100  |
|                      | IGVDJ4  | IGHV2S3               | 97.4                  | 35              | IGHD15S2              | 100                   | 0              | IGHJ1S3               | 100  |
|                      | IGVDJ5  | IGHV2S3               | 98.8                  | 19              | IGHD10S1              | 84.6                  | 3 <sup>c</sup> | IGHJ1S3               | 100  |
|                      | IGVDJ6  | IGHV2S3               | 97.4                  | 10              | IGHD18S1              | 92.3                  | 9              | IGHJ1S3               | 100  |
|                      | IGVDJ7  | IGHV2S3               | 97.7                  | 4 <sup>c</sup>  | IGHD18S1              | 84.2                  | 0              | IGHJ1S5               | 100  |
|                      | IGVDJ8  | IGHV2S3               | 98.0                  | 7               | IGHD20S2              | 84.6                  | 0              | IGHJ1S5               | 100  |
|                      | IGVDJ9  | IGHV2S4               | 98.8                  | 2               | IGHD18S1              | 100                   | 0              | IGHJ1S2               | 100  |
|                      | IGVDJ10 | IGHV2S4               | 99.4                  | 9               | IGHD20S2              | 80                    | 0              | IGHJ1S5               | 100  |
| Fetus 2              | IGVDJ11 | IGHV2S2               | 99.7                  | 1               | IGHD17S1/S2           | 100                   | 0              | IGHJ1S5               | 94.3 |
|                      | IGVDJ12 | IGHV2S2               | 100.0                 | 3               | IGHD17S1/S2           | 100                   | 0              | IGHJ1S5               | 100  |
|                      | IGVDJ13 | IGHV2S3               | 99.4                  | 0               | IGHD13S1              | 100                   | 0              | IGHJ1S2               | 100  |
|                      | IGVDJ14 | IGHV2S3               | 98.8                  | 5               | IGHD9S1               | 100                   | 2              | IGHJ1S3               | 96.6 |
|                      | IGVDJ15 | IGHV2S3               | 98.5                  | 7               | IGHD15S2              | 100                   | 0              | IGHJ1S5               | 96.8 |
|                      | IGVDJ16 | IGHV2S3               | 98.8                  | 3               | IGHD17S1/S2           | 91.7                  | 0              | IGHJ1S5               | 96.8 |
|                      | IGVDJ17 | IGHV2S3               | 99.4                  | 0               | IGHD10S1              | 100                   | 0              | IGHJ1S5               | 94.1 |
|                      | IGVDJ18 | IGHV2S3               | 99.4                  | ND <sup>c</sup> | ND                    | ND                    | ND             | IGHJ1S5               | 96.7 |
|                      | IGVDJ19 | IGHV2S3               | 99.4                  | 0               | IGHD17S1/S2           | 100                   | 0              | IGHJ1S5               | 96.8 |
|                      | IGVDJ20 | IGHV2S3               | 97.7                  | 16              | IGHD15S2              | 92.3                  | 0              | IGHJ1S5               | 96.2 |
| Fetus 3              | IGVDJ21 | IGHV2S3               | 97.4                  | 6               | IGHD18S1              | 84.2                  | 2              | IGHJ1S3               | 100  |
|                      | IGVDJ22 | IGHV2S3               | 96.8                  | 6               | IGHD17S1/S2           | 100                   | 0              | IGHJ1S3               | 93.1 |
|                      | IGVDJ23 | IGHV2S3               | 97.7                  | 7               | IGHD9S1               | 72                    | 3              | IGHJ1S3               | 100  |
|                      | IGVDJ24 | IGHV2S3               | 98.6                  | 33 <sup>c</sup> | IGHD10S1              | 100                   | 0              | IGHJ1S5               | 97.1 |
|                      | IGVDJ25 | IGHV2S3               | 98.5                  | 17              | IGHD10S1              | 100                   | 0              | IGHJ1S5               | 97.1 |
|                      | IGVDJ26 | IGHV2S3               | 97.7                  | 13              | IGHD18S1              | 100                   | 8              | IGHJ1S5               | 100  |
|                      | IGVDJ27 | IGHV2S3               | 98.8                  | 4               | IGHD18S1              | 90                    | 1              | IGHJ1S5               | 100  |
|                      | IGVDJ28 | IGHV2S3               | 97.7                  | 8 <sup>c</sup>  | IGHD24S1              | 100                   | 5              | IGHJ1S5               | 100  |

|                                  |         |         |         |                 |             |                      |                |         |         |      |
|----------------------------------|---------|---------|---------|-----------------|-------------|----------------------|----------------|---------|---------|------|
|                                  | IGVDJ29 | IGHV2S3 | 98.6    | 1               | IGHD17S1/S2 | 100                  | 1              | IGHJ1S5 | 100     |      |
|                                  | IGVDJ30 | IGHV2S4 | 98.8    | 3               | IGHD20S1    | 100                  | 5              | IGHJ1S5 | 100     |      |
| Fetal bone Marrow (n = 33)       |         |         |         |                 |             |                      |                |         |         |      |
| Fetus 1                          | IGVDJ31 | IGHV2S2 | 100.0   | 0               | IGHD18S1    | 66.7                 | 0              | IGHJ1S6 | 97.4    |      |
|                                  | IGVDJ32 | IGHV2S3 | 97.7    | 2               | IGHD15S2    | 91.3                 | 0              | IGHJ1S2 | 100     |      |
|                                  | IGVDJ33 | IGHV2S3 | 97.1    | 4               | IGHD17S1/S2 | 100                  | 0              | IGHJ1S3 | 95.7    |      |
|                                  | IGVDJ34 | IGHV2S3 | 98.8    | 15              | IGHD7S1     | 100                  | 0              | IGHJ1S3 | 100     |      |
|                                  | IGVDJ35 | IGHV2S3 | 97.4    | 9               | IGHD24S1    | 100                  | 3              | IGHJ1S3 | 100     |      |
|                                  | IGVDJ36 | IGHV2S3 | 96.8    | 8               | IGHD15S1    | 100                  | 1 <sup>c</sup> | IGHJ1S5 | 100     |      |
|                                  | IGVDJ37 | IGHV2S3 | 97.4    | ND <sup>c</sup> | ND          | ND                   | ND             | IGHJ1S5 | 100     |      |
|                                  | IGVDJ38 | IGHV2S3 | 96.8    | 16              | IGHD17S1/S2 | 100                  | 1              | IGHJ1S5 | 100     |      |
|                                  | IGVDJ39 | IGHV2S3 | 98.8    | 9               | IGHD18S1    | 100                  | 0              | IGHJ1S5 | 100     |      |
|                                  | IGVDJ40 | IGHV2S4 | 98.8    | 1               | IGHD17S1/S2 | 93.8                 | 0              | IGHJ1S3 | 100     |      |
| Fetus 2                          | IGVDJ41 | IGHV2S4 | 99.4    | 15              | IGHD18S1    | 92.3                 | 0              | IGHJ1S5 | 100     |      |
|                                  | IGVDJ42 | IGHV2S2 | 99.4    | 5               | IGHD18S1    | 84.2                 | 0              | IGHJ1S3 | 100     |      |
|                                  | IGVDJ43 | IGHV2S3 | 98.8    | 5               | IGHD9S1     | 100                  | 0              | IGHJ1S3 | 96.6    |      |
|                                  | IGVDJ44 | IGHV2S3 | 98.8    | 5               | IGHD7S2     | 95.7                 | 0              | IGHJ1S5 | 97      |      |
|                                  | IGVDJ45 | IGHV2S3 | 98.8    | 3               | IGHD20S2    | 83.3                 | 0              | IGHJ1S7 | 100     |      |
|                                  | IGVDJ46 | IGHV1S3 | 99.7    | 1               | IGHD18S1    | 100                  | 0              | IGHJ1S3 | 96.3    |      |
|                                  | IGVDJ47 | IGHV4S2 | 99.7    | 1               | IGHD17S1/S2 | 100                  | 0              | IGHJ1S3 | 100     |      |
|                                  | IGVDJ48 | IGHV4S2 | 99.7    | 0               | IGHD17S1/S2 | 100                  | 0              | IGHJ1S5 | 96.8    |      |
|                                  | IGVDJ49 | IGHV4S5 | 99.7    | 1               | IGHD17S1/S2 | 100                  | 0              | IGHJ1S3 | 96      |      |
|                                  | IGVDJ50 | IGHV4S5 | 98.6    | 0               | IGHD15S2    | 100                  | 0              | IGHJ1S5 | 100     |      |
| Fetus 3                          | IGVDJ51 | IGHV4S5 | 98.6    | 3               | IGHD7S2     | 100                  | 0              | IGHJ1S5 | 100     |      |
|                                  | IGVDJ52 | IGHV2S2 | 100.0   | 3 <sup>c</sup>  | IGHD11S1    | 100                  | 2              | IGHJ1S5 | 100     |      |
|                                  | IGVDJ53 | IGHV2S3 | 97.7    | 10              | IGHD18S1    | 100                  | 4              | IGHJ1S2 | 100     |      |
|                                  | IGVDJ54 | IGHV2S3 | 99.1    | 1 <sup>c</sup>  | IGHD18S1    | 85                   | 5              | IGHJ1S3 | 96.4    |      |
|                                  | IGVDJ55 | IGHV2S3 | 98.8    | 10              | IGHD17S1/S2 | 100                  | 2 <sup>c</sup> | IGHJ1S3 | 100     |      |
|                                  | IGVDJ56 | IGHV2S3 | 97.4    | 13              | IGHD22S1    | 100                  | 0              | IGHJ1S5 | 100     |      |
|                                  | IGVDJ57 | IGHV2S3 | 97.7    | 12              | IGHD22S1    | 100                  | 3              | IGHJ1S5 | 100     |      |
|                                  | IGVDJ58 | IGHV2S3 | 96.8    | 6               | IGHD17S1/S2 | 95                   | 0              | IGHJ1S5 | 100     |      |
|                                  | IGVDJ59 | IGHV2S3 | 98.5    | 17              | IGHD18S1    | 85                   | 2              | IGHJ1S5 | 100     |      |
|                                  | IGVDJ60 | IGHV2S3 | 97.4    | 9               | IGHD4S1     | 100                  | 8              | IGHJ1S5 | 97.1    |      |
| Adult Horse Bone Marrow (n = 32) | IGVDJ61 | IGHV2S3 | 97.4    | 9               | IGHD22S1    | 100                  | 4              | IGHJ1S5 | 100     |      |
|                                  | IGVDJ62 | IGHV4S2 | 98.6    | 5               | IGHD18S1    | 100                  | 0              | IGHJ1S3 | 93.1    |      |
|                                  | IGVDJ63 | IGHV2S4 | 98.8    | 4               | IGHD4S1     | 100                  | 14             | IGHJ1S4 | 91.7    |      |
|                                  | Adult A | IGVDJ64 | IGHV2S2 | 94.8            | 19          | IGHD4S1              | 100            | 6       | IGHJ1S5 | 96   |
|                                  |         | IGVDJ65 | IGHV2S2 | 89.4            | ND          | ND                   | ND             | ND      | IGHJ1S5 | 82.8 |
|                                  |         | IGVDJ66 | IGHV2S2 | 82.9            | 0           | IGHD5S6 <sup>d</sup> | 100            | 0       | IGHJ1S7 | 77.8 |
|                                  |         | IGVDJ67 | IGHV2S3 | 88.5            | 0           | IGHD15S2             | 100            | 7       | IGHJ1S4 | 95.2 |
|                                  |         | IGVDJ68 | IGHV2S3 | 90.7            | 33          | IGHD26S1             | 87.5           | 2       | IGHJ1S5 | 94.4 |
|                                  |         | IGVDJ69 | IGHV2S3 | 92.4            | 14          | IGHD1S1              | 81.8           | 7       | IGHJ1S5 | 86.1 |
|                                  |         | IGVDJ70 | IGHV2S3 | 88.7            | 5           | IGHD5S5              | 100            | 50      | IGHJ1S5 | 90   |
| IGVDJ71                          |         | IGHV2S3 | 89.0    | 5               | IGHD18S1    | 95                   | 19             | IGHJ1S5 | 94.4    |      |
| IGVDJ72                          |         | IGHV2S3 | 95.4    | 16 <sup>c</sup> | IGHD15S2    | 90.9                 | 9              | IGHJ1S7 | 90.9    |      |
| IGVDJ73                          |         | IGHV2S3 | 93.3    | ND              | ND          | ND                   | ND             | IGHJ1S7 | 88.9    |      |
| Adult B                          | IGVDJ74 | IGHV2S4 | 86.3    | ND              | ND          | ND                   | ND             | IGHJ1S5 | 81.5    |      |
|                                  | IGVDJ75 | IGHV2S2 | 79.7    | 0               | IGHD26S1    | 88.9                 | 34             | IGHJ1S5 | 100     |      |
|                                  | IGVDJ76 | IGHV2S2 | 82.4    | 24              | IGHD15S1    | 70                   | 2              | IGHJ1S5 | 100     |      |
|                                  | IGVDJ77 | IGHV2S2 | 89.4    | 7               | IGHD18S1    | 73.9                 | 6              | IGHJ1S5 | 78.1    |      |
|                                  | IGVDJ78 | IGHV2S3 | 83.6    | ND              | ND          | ND                   | ND             | IGHJ1S2 | 88.2    |      |
|                                  | IGVDJ79 | IGHV2S3 | 92.2    | 23              | IGHD16S1    | 92.9                 | 4              | IGHJ1S3 | 95.8    |      |
|                                  | IGVDJ80 | IGHV2S3 | 90.5    | 11              | IGHD5S2     | 70                   | 12             | IGHJ1S5 | 86.7    |      |
|                                  | IGVDJ81 | IGHV2S3 | 89.0    | 23              | IGHD8S3     | 87.5                 | 4              | IGHJ1S5 | 88.9    |      |
|                                  | IGVDJ82 | IGHV2S3 | 89.7    | 12              | IGHD10S1    | 88.5                 | 5              | IGHJ1S5 | 100     |      |
|                                  | IGVDJ83 | IGHV2S3 | 89.5    | ND              | ND          | ND                   | ND             | IGHJ1S5 | 92.9    |      |
| Adult C                          | IGVDJ84 | IGHV2S3 | 91.1    | ND              | ND          | ND                   | ND             | IGHJ1S5 | 100     |      |
|                                  | IGVDJ85 | IGHV2S3 | 89.1    | 23 <sup>c</sup> | IGHD13S1    | 82.4                 | 6              | IGHJ1S6 | 76.3    |      |
|                                  | IGVDJ86 | IGHV2S2 | 87.1    | 10              | IGHD18S1    | 83.3                 | 18             | IGHJ1S5 | 93.1    |      |
|                                  | IGVDJ87 | IGHV2S3 | 88.9    | 0               | IGHD14S1    | 100                  | 8              | IGHJ1S3 | 90.5    |      |
|                                  | IGVDJ88 | IGHV2S3 | 91.0    | 19              | IGHD18S1    | 100                  | 8              | IGHJ1S3 | 100     |      |

|         |         |      |    |          |      |    |         |      |
|---------|---------|------|----|----------|------|----|---------|------|
| IGVDJ89 | IGHV2S3 | 87.8 | ND | ND       | ND   | ND | IGHJ1S5 | 89.7 |
| IGVDJ90 | IGHV2S3 | 80.5 | 18 | IGHD26S1 | 85.7 | 4  | IGHJ1S5 | 95   |
| IGVDJ91 | IGHV2S3 | 87.4 | ND | ND       | ND   | ND | IGHJ1S5 | 85.7 |
| IGVDJ92 | IGHV2S3 | 92.4 | 10 | IGHD18S1 | 76.2 | 6  | IGHJ1S5 | 78.1 |
| IGVDJ93 | IGHV2S3 | 89.8 | ND | ND       | ND   | ND | IGHJ1S5 | 73.5 |
| IGVDJ94 | IGHV2S3 | 91.4 | 14 | IGHD9S1  | 100  | 2  | IGHJ1S7 | 82.8 |
| IGVDJ95 | IGHV2S3 | 91.3 | ND | ND       | ND   | ND | IGHJ1S7 | 87.1 |

a. Identity represents the percent identical nucleotides shared with the germline sequence

b. Junction indicates the number of N + P-nucleotides present at segment junction

c. Junctional nucleotides may include P-nucleotides

d. The annotated IGHD segment of IGVDJ66 was only 4 nucleotides long, however there were only 4 nucleotides between the annotated IGHV and IGHJ segments that were identical to the genomic IGHD5S6.

'ND' indicates that the germline gene segment could not be determined

Supplemental Table 3. Immunoglobulin lambda light chain germline segment use, nucleotide identity with reference genome sequence, and junctional nucleotides

|                            | Sequence | IGLV      |                       | VJ                    |       | IGLJ                  |      |
|----------------------------|----------|-----------|-----------------------|-----------------------|-------|-----------------------|------|
|                            |          | Gene      | Identity <sup>a</sup> | Junction <sup>b</sup> | Gene  | Identity <sup>a</sup> |      |
| Fetal Liver (n = 22)       |          |           |                       |                       |       |                       |      |
| Fetus 1                    | IGLVJ1   | IGLV4-66  | 95.7                  | 2 <sup>c</sup>        | IGLJ1 | 97.4                  |      |
|                            | IGLVJ2   | IGLV4-66  | 99.4                  | 0                     | IGLJ1 | 100                   |      |
|                            | IGLVJ3   | IGLV4-66  | 99.4                  | 1                     | IGLJ5 | 100                   |      |
|                            | IGLVJ4   | IGLV4-69  | 99.7                  | 0                     | IGLJ5 | 100                   |      |
|                            | IGLVJ5   | IGLV4-75  | 100.0                 | 0                     | IGLJ1 | 97.4                  |      |
|                            | IGLVJ6   | IGLV8-128 | 99.2                  | 0                     | IGLJ7 | 100                   |      |
|                            | IGLVJ7   | IGLV8-20  | 98.6                  | 0                     | IGLJ1 | 100                   |      |
|                            | IGLVJ8   | IGLV8-20  | 98.6                  | 0                     | IGLJ4 | 92.3                  |      |
|                            | IGLVJ9   | IGLV8-20  | 98.6                  | 1                     | IGLJ5 | 100                   |      |
|                            | IGLVJ10  | IGLV8-12  | 100.0                 | 0                     | IGLJ5 | 100                   |      |
| Fetus 2                    | IGLVJ11  | IGLV4-66  | 100.0                 | 0                     | IGLJ1 | 97.1                  |      |
|                            | IGLVJ12  | IGLV4-66  | 100.0                 | 0                     | IGLJ1 | 97.1                  |      |
| Fetus 3                    | IGLVJ13  | IGLV2-41  | 100.0                 | 0                     | IGLJ1 | 100                   |      |
|                            | IGLVJ14  | IGLV4-75  | 100.0                 | 1 <sup>c</sup>        | IGLJ5 | 100                   |      |
|                            | IGLVJ15  | IGLV4-75  | 100.0                 | 0                     | IGLJ7 | 100                   |      |
|                            | IGLVJ16  | IGLV6-98  | 99.4                  | 0                     | IGLJ4 | 94.4                  |      |
|                            | IGLVJ17  | IGLV8-133 | 94.9                  | 0                     | IGLJ5 | 100                   |      |
|                            | IGLVJ18  | IGLV8-24  | 99.7                  | 0                     | IGLJ1 | 97.1                  |      |
|                            | IGLVJ19  | IGLV8-24  | 98.8                  | 2                     | IGLJ5 | 97.1                  |      |
|                            | IGLVJ20  | IGLV8-24  | 97.1                  | 1                     | IGLJ5 | 97.1                  |      |
|                            | IGLVJ21  | IGLV8-12  | 100.0                 | 2                     | IGLJ5 | 97.1                  |      |
|                            | IGLVJ22  | IGLV8-12  | 100.0                 | 0                     | IGLJ5 | 100                   |      |
| Fetal Bone Marrow (n = 30) |          |           |                       |                       |       |                       |      |
| Fetus 1                    | IGLVJ23  | IGLV2-41  | 99.7                  | 0                     | IGLJ1 | 100                   |      |
|                            | IGLVJ24  | IGLV2-41  | 100.0                 | 0                     | IGLJ1 | 100                   |      |
|                            | IGLVJ25  | IGLV4-66  | 99.4                  | 1                     | IGLJ4 | 94.4                  |      |
|                            | IGLVJ26  | IGLV4-66  | 99.4                  | 2                     | IGLJ4 | 91.7                  |      |
|                            | IGLVJ27  | IGLV4-66  | 99.4                  | 1                     | IGLJ5 | 97.1                  |      |
|                            | IGLVJ28  | IGLV6-98  | 99.4                  | 0                     | IGLJ5 | 100                   |      |
|                            | IGLVJ29  | IGLV8-137 | 100.0                 | 0                     | IGLJ5 | 100                   |      |
|                            | IGLVJ30  | IGLV8-24  | 100.0                 | 1                     | IGLJ5 | 97.1                  |      |
|                            | IGLVJ31  | IGLV8-24  | 100.0                 | 0                     | IGLJ5 | 100                   |      |
|                            | IGLVJ32  | IGLV8-12  | 99.7                  | 0                     | IGLJ5 | 100                   |      |
|                            | Fetus 2  | IGLVJ33   | IGLV4-66              | 100.0                 | 0     | IGLJ1                 | 97.1 |
|                            |          | IGLVJ34   | IGLV4-66              | 99.7                  | 0     | IGLJ1                 | 97.1 |
|                            |          | IGLVJ35   | IGLV8-122             | 96.6                  | 0     | IGLJ4                 | 97.3 |
| IGLVJ36                    |          | IGLV8-122 | 91.0                  | 0                     | IGLJ4 | 97.2                  |      |
| IGLVJ37                    |          | IGLV8-128 | 98.9                  | 1                     | IGLJ5 | 97.1                  |      |
| IGLVJ38                    |          | IGLV8-28  | 99.4                  | 0                     | IGLJ4 | 97.4                  |      |
| IGLVJ39                    |          | IGLV8-28  | 99.1                  | 1                     | IGLJ4 | 97                    |      |
| IGLVJ40                    |          | IGLV8-28  | 99.4                  | 0                     | IGLJ4 | 97.2                  |      |
| IGLVJ41                    |          | IGLV8-24  | 99.7                  | 0                     | IGLJ4 | 97.3                  |      |

|         |                                  |           |           |                |       |       |      |
|---------|----------------------------------|-----------|-----------|----------------|-------|-------|------|
| Fetus 3 | IGLVJ42                          | IGLV8-24  | 99.4      | 1              | IGLJ7 | 97.1  |      |
|         | IGLVJ43                          | IGLV4-66  | 99.4      | 2 <sup>c</sup> | IGLJ1 | 100   |      |
|         | IGLVJ45                          | IGLV4-66  | 99.4      | 1 <sup>c</sup> | IGLJ5 | 100   |      |
|         | IGLVJ46                          | IGLV4-66  | 99.4      | 0              | IGLJ5 | 100   |      |
|         | IGLVJ47                          | IGLV4-75  | 100.0     | 1              | IGLJ5 | 97.1  |      |
|         | IGLVJ48                          | IGLV4-75  | 100.0     | 4              | IGLJ5 | 97.1  |      |
|         | IGLVJ49                          | IGLV8-26  | 98.9      | 1              | IGLJ5 | 97.1  |      |
|         | IGLVJ50                          | IGLV8-24  | 99.7      | 3 <sup>c</sup> | IGLJ7 | 100   |      |
|         | IGLVJ51                          | IGLV8-20  | 98.3      | 1              | IGLJ4 | 97    |      |
|         | IGLVJ52                          | IGLV8-20  | 98.6      | 0              | IGLJ7 | 100   |      |
|         | IGLVJ53                          | IGLV8-12  | 100.0     | 0              | IGLJ7 | 100   |      |
|         | Adult Horse Bone Marrow (n = 33) |           |           |                |       |       |      |
|         | Adult A                          | IGLVJ54   | IGLV8-122 | 93.2           | 0     | IGLJ4 | 94.7 |
| IGLVJ55 |                                  | IGLV8-128 | 86.5      | 14             | IGLJ4 | 91.7  |      |
| IGLVJ56 |                                  | IGLV8-128 | 90.9      | 20             | IGLJ5 | 96.9  |      |
| IGLVJ57 |                                  | IGLV8-128 | 90.8      | 0              | IGLJ5 | 100   |      |
| IGLVJ58 |                                  | IGLV8-128 | 92.5      | 2              | IGLJ5 | 100   |      |
| IGLVJ59 |                                  | IGLV8-128 | 88.0      | 2              | IGLJ7 | 91.4  |      |
| IGLVJ60 |                                  | IGLV8-128 | 89.7      | 5              | IGLJ7 | 96.6  |      |
| IGLVJ61 |                                  | IGLV8-133 | 88.6      | 3 <sup>c</sup> | IGLJ5 | 89.5  |      |
| IGLVJ62 |                                  | IGLV8-24  | 88.6      | 17             | IGLJ1 | 93.8  |      |
| IGLVJ63 |                                  | IGLV8-24  | 86.6      | 19             | IGLJ5 | 85.3  |      |
| Adult B | IGLVJ64                          | IGLV8-20  | 90.1      | 8              | IGLJ5 | 90.3  |      |
|         | IGLVJ65                          | IGLV6-109 | 85.6      | 30             | IGLJ7 | 90.3  |      |
|         | IGLVJ66                          | IGLV8-122 | 84.5      | 1              | IGLJ7 | 94.3  |      |
|         | IGLVJ67                          | IGLV8-128 | 84.8      | 20             | IGLJ7 | 93.5  |      |
|         | IGLVJ68                          | IGLV8-128 | 88.8      | 19             | IGLJ7 | 100   |      |
|         | IGLVJ69                          | IGLV8-128 | 85.7      | 1              | IGLJ7 | 96.8  |      |
|         | IGLVJ70                          | IGLV8-128 | 88.5      | 17             | IGLJ7 | 86.7  |      |
|         | IGLVJ71                          | IGLV8-128 | 90.9      | 10             | IGLJ7 | 93.3  |      |
|         | IGLVJ72                          | IGLV8-128 | 85.1      | 5              | IGLJ7 | 93.5  |      |
|         | IGLVJ73                          | IGLV8-128 | 79.2      | 25             | IGLJ7 | 81.6  |      |
| Adult C | IGLVJ74                          | IGLV8-24  | 89.4      | 15             | IGLJ7 | 83.8  |      |
|         | IGLVJ75                          | IGLV6-101 | 93.2      | 18             | IGLJ7 | 78.1  |      |
|         | IGLVJ76                          | IGLV8-122 | 86.1      | 4              | IGLJ4 | 78.8  |      |
|         | IGLVJ77                          | IGLV8-122 | 87.8      | 16             | IGLJ5 | 93.5  |      |
|         | IGLVJ78                          | IGLV8-122 | 83.8      | 7              | IGLJ7 | 89.5  |      |
|         | IGLVJ79                          | IGLV8-128 | 93.3      | 0              | IGLJ5 | 91.4  |      |
|         | IGLVJ80                          | IGLV8-128 | 71.7      | 20             | IGLJ5 | 77.4  |      |
|         | IGLVJ81                          | IGLV8-128 | 82.3      | 15             | IGLJ7 | 87.1  |      |
|         | IGLVJ82                          | IGLV8-128 | 92.0      | 4              | IGLJ7 | 94.3  |      |
|         | IGLVJ83                          | IGLV8-128 | 83.3      | 11             | IGLJ7 | 87.5  |      |
|         | IGLVJ84                          | IGLV8-128 | 88.1      | 5              | IGLJ7 | 100   |      |
|         | IGLVJ85                          | IGLV8-28  | 88.1      | 15             | IGLJ7 | 93.9  |      |
|         | IGLVJ86                          | IGLV8-24  | 89.3      | 14             | IGLJ7 | 85.7  |      |

a. Identity represents the percent identical nucleotides shared with the germline sequence

b. Junction indicates the number of N + P-nucleotides present at segment junction

c. Junctional nucleotides may include P-nucleotides

Supplemental Table 4: Nucleotides removed from the 3' ends of IGHV and IGLV segments and 5' ends of IGHJ and IGLJ segments

|                         | Heavy Chain    |                | Lambda Light Chain |                |
|-------------------------|----------------|----------------|--------------------|----------------|
|                         | IGLV           | IGLJ           | IGLV               | IGLJ           |
|                         | Median (range) | Median (range) | Median (range)     | Median (range) |
| Fetal liver             | 4 (0 – 5)      | 2 (0 – 17)     | 1 (0 – 11)         | 3 (0 – 8)      |
| Fetal bone marrow       | 4 (0 – 6)      | 2 (0 – 11)     | 1 (0 – 9)          | 3 (0 – 6)      |
| Adult horse bone marrow | 4 (0 – 7)      | 7 (0 – 20)     | 10 (0 – 28)        | 6 (0 – 8)      |
