# Supplementary material
Source: PubMed Central journal article supplement (PMC4198492)
Supplement: NIHMS625134-supplement-251_2014_799_MOESM3_ESM.pdf [file NIHMS625134-supplement-251_2014_799_MOESM3_ESM.pdf]

|         | CDR1                                                                                                                            | CDR2                                                          | CDR3                 |                                  |
|---------|---------------------------------------------------------------------------------------------------------------------------------|---------------------------------------------------------------|----------------------|----------------------------------|
| CONS    | MSHLWFLFLVAAPTCLVLSQVQLKESGPGLVKPSQTLSTCTVCSGLSLSS--NAVGVWRQAPGKGLVGVGATYGS--GS--ANYNPALKSRASITKDTSKSQVYLTLNLSLTSQEDTAVVYVYAG-- |                                                               |                      | -----YVYVYVGINWVGQGI             |
| IGVDJ1  | .N.....T.....                                                                                                                   | .N.V.....E..TY..                                              | .G.....G.....GC..... | -----ISYGY.SRSC.FFG...T          |
| IGVDJ11 | .N.....T.....                                                                                                                   | .N.V.....E..TY..                                              | .G.....G.....A.....  | -----ATAAML.T...D....            |
| IGVDJ12 | .N.....T.....                                                                                                                   | .N.V.....E..TY..                                              | .G.....G.....G.....  | -----YSYSS.A.....                |
| IGVDJ2  | .N.....F.....Y.....                                                                                                             | .N.V.....E..TY..                                              | .G.....G.....RE..... | -----RSGSSW.LR.GYVDH...T         |
| IGVDJ3  | .N.....F.....Y.....                                                                                                             | .N.V.....E..TY..                                              | .G.....G.....V.....  | -----NGDYG.G.A.GYVDH...T         |
| IGVDJ4  | .N.....F.....Y.....                                                                                                             | .N.V.....E..TY..                                              | .G.....G.....G.....  | -----GRNHL-HPQKHVGGSSW.YFG...T   |
| IGVDJ5  | .N.....F.....Y.....                                                                                                             | .N.V.....E..TY..                                              | .G.....G.....F.....  | -----RDNYG.G.AT.YFG...T          |
| IGVDJ6  | .N.....F.....Y.....                                                                                                             | .N.V.....E..TY..                                              | .G.....G.....G.....  | -----WNLRLLWSMGHPG...T           |
| IGVDJ7  | .N.....F.....Y.....                                                                                                             | .N.V.....E..TY..                                              | .G.....G.....R.....  | -----SYYG.G.A.....               |
| IGVDJ8  | .N.....F.....Y.....                                                                                                             | .N.V.....E..TY..                                              | .G.....G.....R.....  | -----EIRLW.....                  |
| IGVDJ13 | .N.....F.....Y.....                                                                                                             | .N.V.....E..TY..                                              | .G.....G.....R.....  | -----YGSY.SS..GYVDH...T          |
| IGVDJ14 | .N.....F.....Y.....                                                                                                             | .N.V.....E..TY..                                              | .G.....G.....R.....  | -----YGY.ASG.DYFS...T            |
| IGVDJ15 | .N.....F.....Y.....                                                                                                             | .N.V.....E..TY..                                              | .G.....G.....R.....  | -----IIVPGT...D....              |
| IGVDJ16 | .N.....F.....Y.....                                                                                                             | .N.V.....E..TY..                                              | .G.....G.....R.....  | -----GS.A.G.--D....              |
| IGVDJ17 | .N.....F.....Y.....                                                                                                             | .N.V.....E..TY..                                              | .G.....G.....R.....  | -----YS.GS...D....               |
| IGVDJ18 | .N.....F.....Y.....                                                                                                             | .N.V.....E..TY..                                              | .G.....G.....R.....  | -----WVW...D....                 |
| IGVDJ19 | .N.....F.....Y.....                                                                                                             | .N.V.....E..TY..                                              | .G.....G.....R.....  | -----SS.A.D....                  |
| IGVDJ20 | .N.....F.....Y.....                                                                                                             | .N.V.....E..TY..                                              | .G.....G.....R.....  | -----D.....LIDL.YGSSSW.C.D....   |
| IGVDJ21 | .N.....F.....Y.....                                                                                                             | .N.V.....E..TY..                                              | .G.....G.....R.....  | -----FYG.G.ATYFG...T             |
| IGVDJ22 | .N.....F.....Y.....                                                                                                             | .N.V.....E..TY..                                              | .G.....G.....R.....  | -----CAIAAMLG...T                |
| IGVDJ23 | .N.....F.....Y.....                                                                                                             | .N.V.....E..TY..                                              | .G.....G.....R.....  | -----GWN.N.G.G.AHPG...T          |
| IGVDJ24 | .N.....F.....Y.....                                                                                                             | .N.V.....E..TY..                                              | .G.....G.....R.....  | -----RSEG--PSFPPTQFLS.GS...T     |
| IGVDJ25 | .N.....F.....Y.....                                                                                                             | .N.V.....E..TY..                                              | .G.....G.....R.....  | -----G.....EAQDS.GS...T          |
| IGVDJ26 | .N.....F.....Y.....                                                                                                             | .N.V.....E..TY..                                              | .G.....G.....R.....  | -----IYGYG.RLG...T               |
| IGVDJ27 | .N.....F.....Y.....                                                                                                             | .N.V.....E..TY..                                              | .G.....G.....R.....  | -----G.V.....                    |
| IGVDJ28 | .N.....F.....Y.....                                                                                                             | .N.V.....E..TY..                                              | .G.....G.....R.....  | -----SGQRVGVKS...T               |
| IGVDJ29 | .N.....F.....Y.....                                                                                                             | .N.V.....E..TY..                                              | .G.....G.....R.....  | -----TAMLT...T                   |
| IGVDJ9  | .N.....F.....Y.....                                                                                                             | .N.V.....E..TY..                                              | .G.....G.....R.....  | -----YGYGGA..GYVDH...T           |
| IGVDJ10 | .N.....F.....Y.....                                                                                                             | .N.V.....E..TY..                                              | .G.....G.....R.....  | -----PTDG.G...T                  |
| IGVDJ30 | .N.....F.....Y.....                                                                                                             | .N.V.....E..TY..                                              | .G.....G.....R.....  | -----DGSNWP.G...T                |
| IGVDJ31 | .N.....F.....Y.....                                                                                                             | .N.V.....E..TY..                                              | .G.....G.....R.....  | -----WSRLNL..NAMDP...T           |
| IGVDJ42 | .N.....F.....Y.....                                                                                                             | .N.V.....E..TY..                                              | .G.....G.....R.....  | -----N.G.G.AFG...T               |
| IGVDJ52 | .N.....F.....Y.....                                                                                                             | .N.V.....E..TY..                                              | .G.....G.....R.....  | -----CLY--DCTGHGCV.ID...T        |
| IGVDJ32 | .N.....F.....Y.....                                                                                                             | .N.V.....E..TY..                                              | .G.....G.....R.....  | -----LGGSSW.S.GYVDH...T          |
| IGVDJ33 | .N.....F.....Y.....                                                                                                             | .N.V.....E..TY..                                              | .G.....G.....R.....  | -----ATAAMLGH...T                |
| IGVDJ34 | .N.....F.....Y.....                                                                                                             | .N.V.....E..TY..                                              | .G.....G.....R.....  | -----G.....IFY.Y.SRSC.YFG...T    |
| IGVDJ35 | .N.....F.....Y.....                                                                                                             | .N.V.....E..TY..                                              | .G.....G.....R.....  | -----GGRVGVRVG...T               |
| IGVDJ36 | .N.....F.....Y.....                                                                                                             | .N.V.....E..TY..                                              | .G.....G.....R.....  | -----LIP--MLVVT.TT...T           |
| IGVDJ37 | .N.....F.....Y.....                                                                                                             | .N.V.....E..TY..                                              | .G.....G.....R.....  | -----SRG...T                     |
| IGVDJ38 | .N.....F.....Y.....                                                                                                             | .N.V.....E..TY..                                              | .G.....G.....R.....  | -----EALYSS.A.D...T              |
| IGVDJ39 | .N.....F.....Y.....                                                                                                             | .N.V.....E..TY..                                              | .G.....G.....R.....  | -----GIGGA...T                   |
| IGVDJ43 | .N.....F.....Y.....                                                                                                             | .N.V.....E..TY..                                              | .G.....G.....R.....  | -----YGY.ASG.DYFS...T            |
| IGVDJ44 | .N.....F.....Y.....                                                                                                             | .N.V.....E..TY..                                              | .G.....G.....R.....  | -----YGSYAGS...D....             |
| IGVDJ45 | .N.....F.....Y.....                                                                                                             | .N.V.....E..TY..                                              | .G.....G.....R.....  | -----G.G..D.D...T                |
| IGVDJ53 | .N.....F.....Y.....                                                                                                             | .N.V.....E..TY..                                              | .G.....G.....R.....  | -----SFRG--YGYGGA..A.GYVDH...T   |
| IGVDJ54 | .N.....F.....Y.....                                                                                                             | .N.V.....E..TY..                                              | .G.....G.....R.....  | -----YGY.G.ATFFG...T             |
| IGVDJ55 | .N.....F.....Y.....                                                                                                             | .N.V.....E..TY..                                              | .G.....G.....R.....  | -----APIAAMLT.YFG...T            |
| IGVDJ56 | .N.....F.....Y.....                                                                                                             | .N.V.....E..TY..                                              | .G.....G.....R.....  | -----VCLD..GAIDY...T             |
| IGVDJ57 | .N.....F.....Y.....                                                                                                             | .N.V.....E..TY..                                              | .G.....G.....R.....  | -----RRRG--ADYGAID.TN...T        |
| IGVDJ58 | .N.....F.....Y.....                                                                                                             | .N.V.....E..TY..                                              | .G.....G.....R.....  | -----GFYSS.A...T                 |
| IGVDJ59 | .N.....F.....Y.....                                                                                                             | .N.V.....E..TY..                                              | .G.....G.....R.....  | -----GF--RHNYG.G.AT...T          |
| IGVDJ60 | .N.....F.....Y.....                                                                                                             | .N.V.....E..TY..                                              | .G.....G.....R.....  | -----GLD--YGDTF.FLGL...T         |
| IGVDJ61 | .N.....F.....Y.....                                                                                                             | .N.V.....E..TY..                                              | .G.....G.....R.....  | -----VR--YGAID.MG...T            |
| IGVDJ46 | .GWS.RI...VASG.S.EG..EQ..E.K.GSSVKIS.KA..YTF...Y.H..N..I.WM.S..A--EYDDTS.A.KFQG.VTM.A.K.T.T.ME.S..                              |                                                               |                      | -----TRLNLF.G...T                |
| IGVDJ47 | .RL.CILL..T.OG..O..O..O..T.G.IT.SYSSWS.L.P..M.Y.YD..R..TY..SF..T.SR..N.FS.Q.S.V.T.A..R.....                                     |                                                               |                      | -----HSS.AFG...T                 |
| IGVDJ48 | .RL.CILL..T.OG..O..O..O..T.G.IT.SYSSWS.L.P..M.Y.YD..R..TY..SF..T.SR..N.FS.Q.S.V.T.A..S.....                                     |                                                               |                      | -----SS.A.D...T                  |
| IGVDJ62 | .RL.CILL..T.OG..O..O..O..T.G.IT.SYSSWS.L.P..M.Y.YD..R..TY..SF..T.SR..RN.FS.Q.S.V.A.A..E.....                                    |                                                               |                      | -----GCILLG...T                  |
| IGVDJ49 | .RL.GILL.C.T.OG..O..O..O..T.G.IT.RYVGSW.I.T..I.S.TY.....TY.S.SF...SR..P.N.FS.Q.S.V.T.S.....                                     |                                                               |                      | -----VSS.AYG...T                 |
| IGVDJ50 | .RL.GILL.C.T.OG..O..O..O..T.G.IT.RYVGSW.I.T..I.S.TY.....TY.S.S.H..SR..N.FS.Q.S.V.T.S.....                                       |                                                               |                      | -----YGGSSW...T                  |
| IGVDJ51 | .RL.GILL.C.T.OG..O..O..O..T.G.IT.RYVGSW.I.T..I.S.AY.....TY.S.S.H..SR..N.FS.Q.S.V.T.SV.....                                      |                                                               |                      | -----YGYVAGS...T                 |
| IGVDJ40 | .N.....F.....Y.....                                                                                                             | .N.V.....E..TY..                                              | .G.....G.....R.....  | -----HSS.AFG...T                 |
| IGVDJ41 | .N.....F.....Y.....                                                                                                             | .N.V.....E..TY..                                              | .G.....G.....R.....  | -----SAGYN.G.G...T               |
| IGVDJ63 | .N.....F.....Y.....                                                                                                             | .N.V.....E..TY..                                              | .G.....G.....R.....  | -----RLD--DYGDTF..RQNPLG...T     |
| IGVDJ64 | .N..L.....F.....Y.....                                                                                                          | .N.V.GVD.....TY.S..R.....                                     | .G.....G.....V.....  | -----SDYGT..FLAN...T             |
| IGVDJ65 | .N.....V.....NT--DVI.....                                                                                                       | .N.V.GNG--EN--RW.....VD...TE..G.SG.F.....                     |                      | -----SIGSPAD..DR...T             |
| IGVDJ66 | .N.....T.....S.....M.....I.P.TA--G..IQ.....                                                                                     | WI.L.YP..N--TD..L.R.NI.W.SG.V.....                            |                      | -----MGHE.K.HT...N               |
| IGVDJ75 | .N.....A.E.S..D.....M.....PG.F..L.....                                                                                          | WI.ELWKDDFT.NGNTYI.H.G..F.Y.R..S.E.....                       |                      | -----DNSGANWMSSET.V...T          |
| IGVDJ76 | .N.....R.A.E.....S..Y.NG--GE.N..R..WI.E.R.DD--HRT..LT..RL.M.NA.....E.A.L.V.....                                                 |                                                               |                      | -----IAGEGLFAGYL...T             |
| IGVDJ77 | .N.....P.....A.....FD..R.....                                                                                                   | W.AR.V.DNE--E..V.....Y.V.R.....Y.A.A.I.G.....                 |                      | -----YVV--GAGGTI.FGNW..RH...T    |
| IGVDJ86 | .N.....P.....A.....FD..R.....                                                                                                   | GLST.G--LTR.GSV..V.I.DD..I..I..F..GSL--DGGFGVGSFFLP.N.KF..... |                      | -----SW.IGD...T                  |
| IGVDJ67 | .N.....I..T.NE--YG.A.....R.....                                                                                                 | AG.RKD--E..V.....A.E.S.G.....                                 |                      | -----SW.IGD...T                  |
| IGVDJ68 | .N.....V.P.E.....R.....                                                                                                         | F.AD--AGDGT.M.....                                            |                      | -----GLDFHDAI.GPDNT...T          |
| IGVDJ69 | .N.....D.....A.....E.S.ASR--R--TS.....M.....                                                                                    |                                                               |                      | -----SHSGESVQHLI.E...T           |
| IGVDJ70 | .N.....E.....A.....N--V.A.A.....F.S.....                                                                                        | TRG.H..E..R.IGA.RIG.....D.....                                |                      | -----GIS--SSLPTGMLRRTPP.LHL...T  |
| IGVDJ71 | .N.....T.D..H..G.....Y.HSH--E--TL..N..L..D.....                                                                                 |                                                               |                      | -----V.KW--GNHGA..AS.EA...T      |
| IGVDJ72 | .N.....FP..YT.....I.ESL--A--QM.....G.....                                                                                       |                                                               |                      | -----LMW--NGADGRRR..D.P...T      |
| IGVDJ73 | .N.....A.....DMSGG--PR.D.....R.A.....                                                                                           |                                                               |                      | -----GGE--YGGALP.DSS.WE.D...T    |
| IGVDJ78 | .N.....L..T.E.A.F..T..W..HS..DP.GVGYGG--KSE..E..T.R.....T.YGM.G..VR.....                                                        |                                                               |                      | -----SEFFPFR.LGSVDQ...T          |
| IGVDJ79 | .N.....V..Y.G.A.....P.I.GKSD.G--TS.A..M.....K.....                                                                              |                                                               |                      | -----RRMGDAN..GLA.D...T          |
| IGVDJ80 | .N.....G.....F..TSDSDG--G.W..V..N.R.....F.....                                                                                  |                                                               |                      | -----CSSM..AIAMCETQ...T          |
| IGVDJ81 | .N.....N.....G.....AF.D.SAGG--DTD..S..A.A.R.I..D.E.F.....                                                                       |                                                               |                      | -----GTHVGNL.SN.K...T            |
| IGVDJ82 | .N.....T..T..L.....T.D.....F..GVE.G--EEV.....V.....                                                                             |                                                               |                      | -----GLG--NYYSYGG..AGD...T       |
| IGVDJ83 | .N.....T.....PQR--DG.....P.I..PHPFG--NPY.....E..T.D.....                                                                        |                                                               |                      | -----AR--QGVHF.PWGNL..D...T      |
| IGVDJ84 | .N.....F..D--W.Y..T.....L.S.....FSS.S.S.....P.N.....G..W.R.....                                                                 |                                                               |                      | -----ALLD...T                    |
| IGVDJ85 | .N.....T.....L..F.....P.GQNKDG--GRA..SV.....D..V.....                                                                           |                                                               |                      | -----VRYCPEGSEHYGVYSDG..VPPG...T |
| IGVDJ87 | .N.....F.....S.....P..RSDG--TFF.H..S.A.G..V..G.....                                                                             |                                                               |                      | -----NAS.YG...T                  |
| IGVDJ88 | .N.....R.K..Q..S.T.....RD--DVL.....T.P.AT.N.G--SSK.....L.E.H.....                                                               |                                                               |                      | -----GGMVG.GPSSFG...T            |
| IGVDJ89 | .N.....L.....R.K..S.T.....EWN.K--W.S..T.E..PIVGSWEGG--KPN..R.VV..L..D..N.A.....                                                 |                                                               |                      | -----GSDHPDNLH..P...T            |
| IGVDJ91 | .N.....L.....D.TT--T.T.....Q..ELTTLG--NLV.....E.T.R.....L.F.TA.....                                                             |                                                               |                      | -----ELGNND..FM...T              |
| IGVDJ92 | .N.....H.....NT--YG.....F.G.AR.G--I.K..D.....I.S.....I..T.G.....                                                                |                                                               |                      | -----DGYVTF.FDND..L.A...T        |
| IGVDJ93 | .N.....S.G..G--KTI.....S.EK--S..Q..CR.....EG.....T.GAS--                                                                        |                                                               |                      | -----ADDMYLD.AF.FRLSH...T        |
| IGVDJ94 | .N.....V.....A..A..F.....L.R.FSDG--STD.....V.R.G.....G.....                                                                     |                                                               |                      | -----GTPDGSASGDMYF...T           |
| IGVDJ95 | .N.....E--RG.....WL.DMNT.G--G.KF.....F..M.....                                                                                  |                                                               |                      | -----DVPGLD.FD.DW...T            |
| IGVDJ74 | .N.....A.....SLPRG--G..I.....K..K..FATBUD--R--VHLT..ST...S...NE.....I.....A.....                                                |                                                               |                      | -----FPRE.VG...T                 |

Fetal Liver

Fetal Bone Marrow

Adult Bone Marrow

Supplemental Fig. 2 Amino acid sequence alignment of immunoglobulin heavy chain variable region in equine fetal and adult horse primary lymphoid tissues. Ig heavy chain variable region nucleotide sequences and their respective translated amino acid sequences were obtained from equine fetal (liver and bone marrow) and adult horse (bone marrow) whole tissues. Alignment of the heavy chain variable region with amino acids identical to the consensus sequence are represented as dots, and residues different from the consensus noted. Gaps in the alignment are represented by dashes. The three CDR regions are indicated above the consensus sequence (Sun et al. 2010; Tallmadge et al. 2013). Sequences from each tissue are ordered based on IGHV gene indicated to the right of each amino acid sequence.
